# Supplementary material
Source: PubMed Central journal article supplement (PMC3990501)
Supplement: NIHMS550359-supplement-04.pdf [file NIHMS550359-supplement-04.pdf]

# CSD-tfPCA

Plots (Factor Loadings)

Topographies (Factor Scores)

PCA Solution 1-30 Hz

**610-9**  
(31.9%)  
*Alpha ERD*

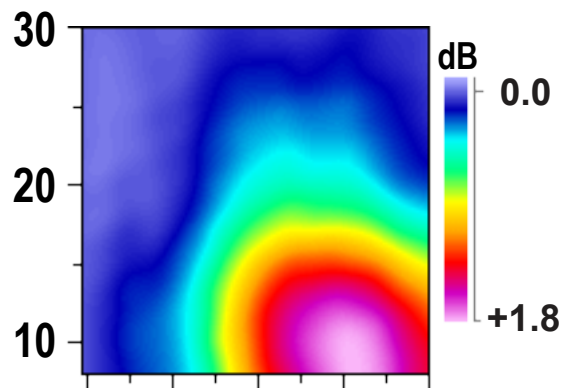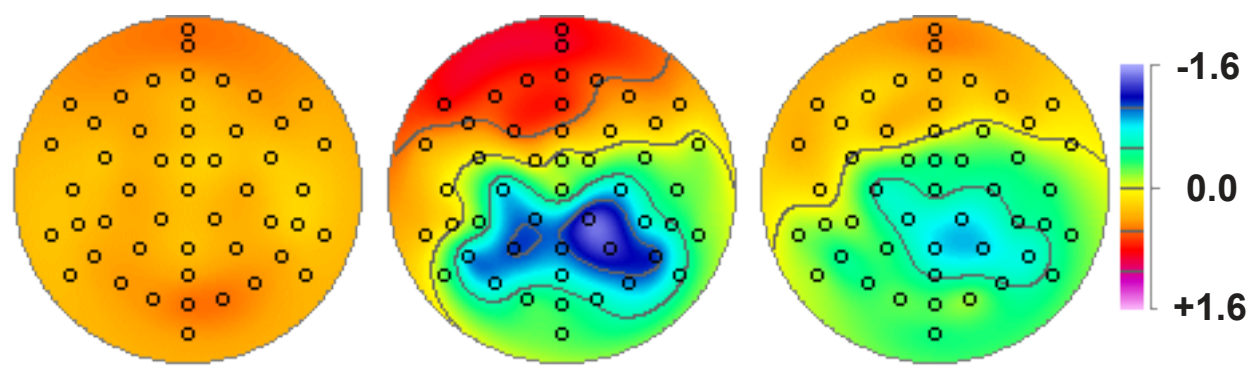

PCA Solution 8-30 Hz

**590-11**  
(32.1%)  
*Alpha ERD*

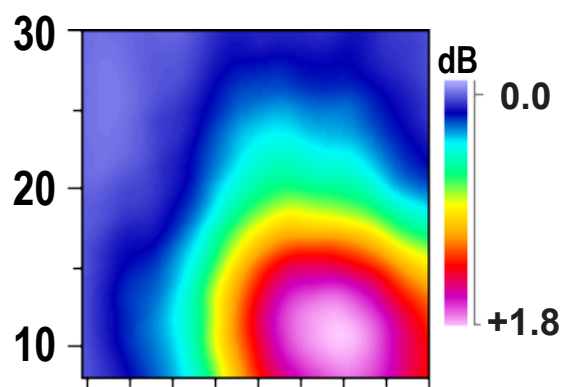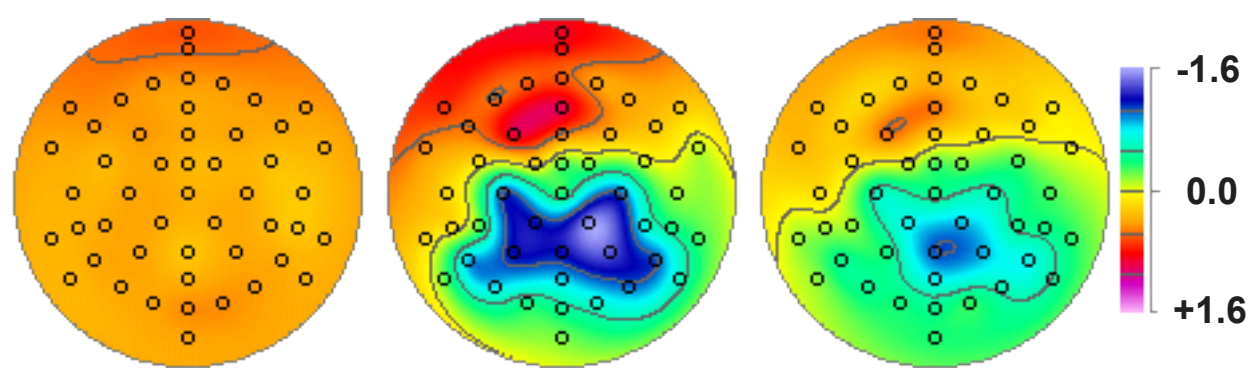

**260-1**  
(16.0%)  
*NVS ERS*

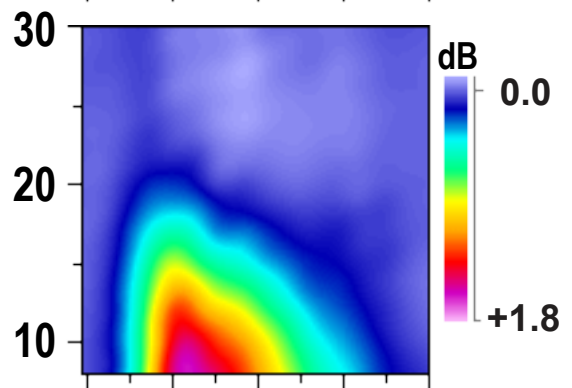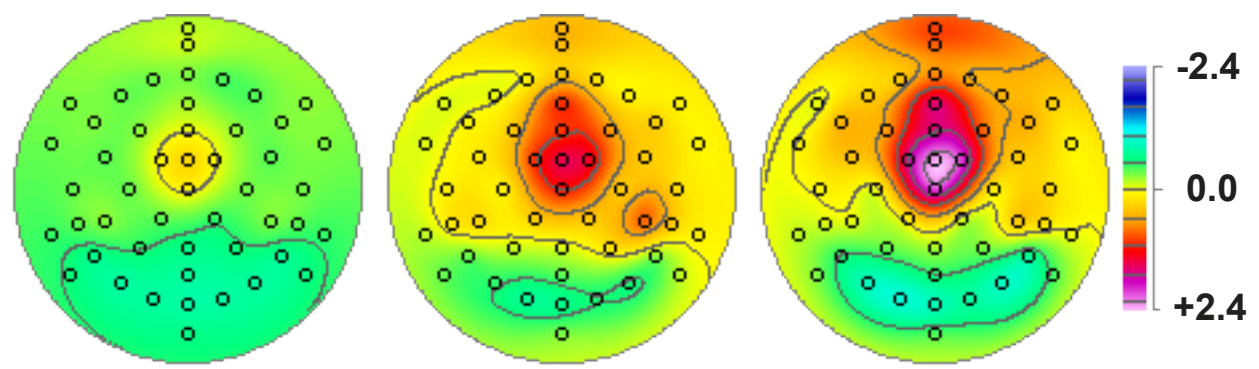

**230-8**  
(10.0%)  
*NVS ERS*

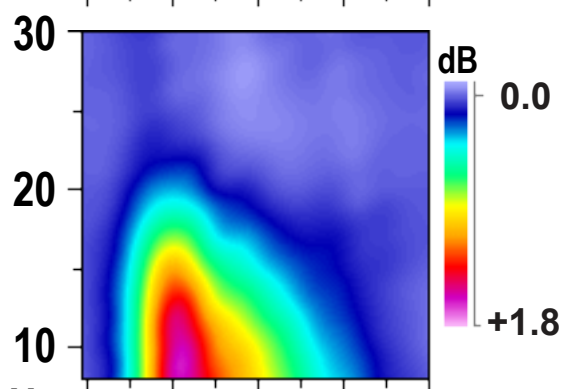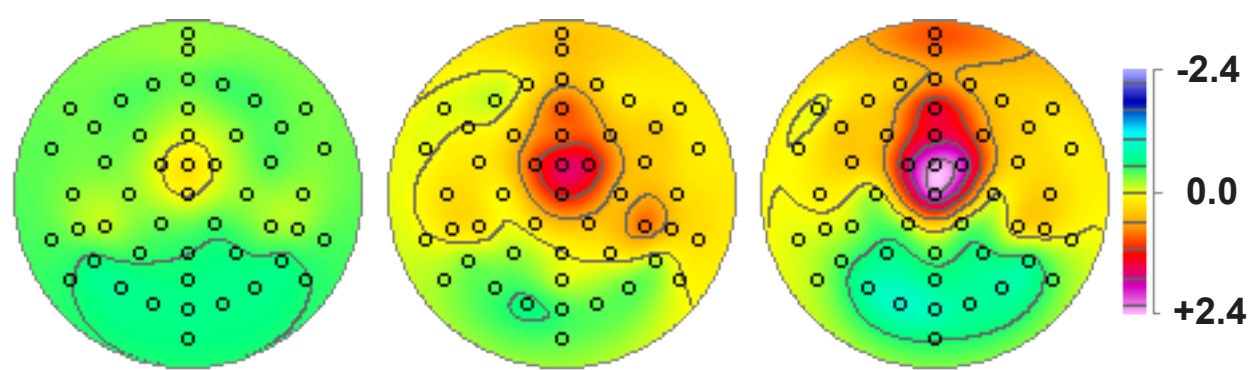

Hz 0 400 800 ms

Nontarget

Target

Novel
