# Supplementary material
Source: PubMed Central journal article supplement (PMC3990501)

Patients ( $n = 22$ )

Controls ( $n = 20$ )

Nontarget

Target

Novel

Nontarget

Target

Novel

*N1*  
(135)

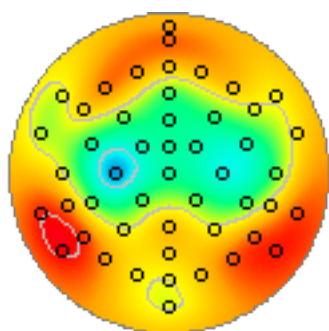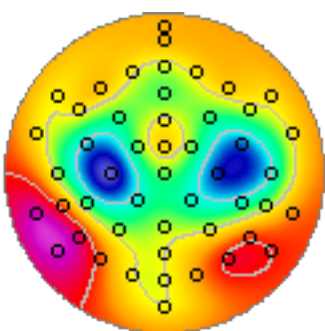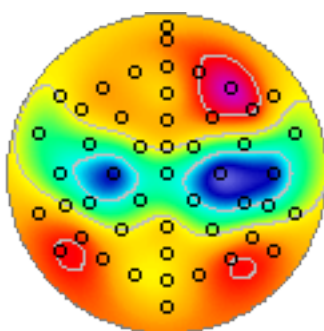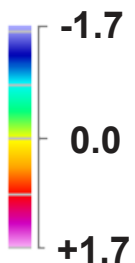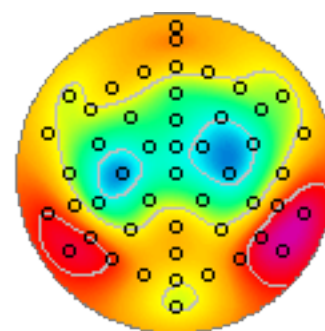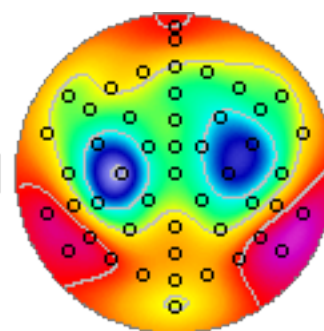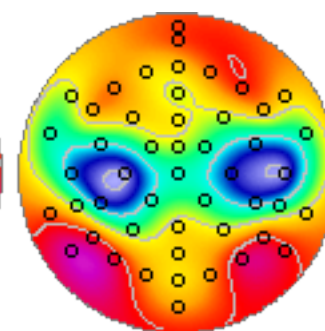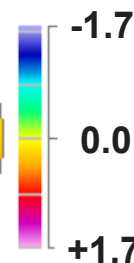

*Temporal N1*  
(185)

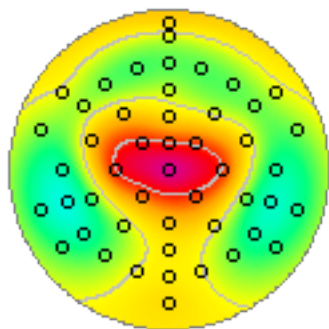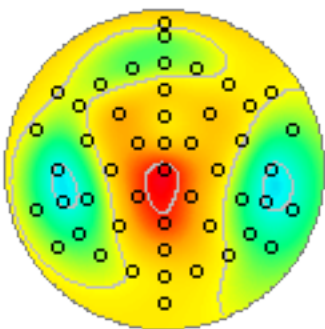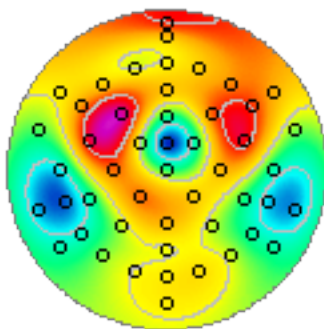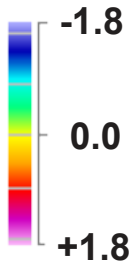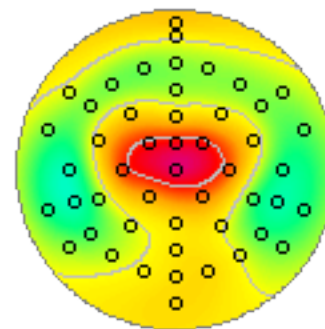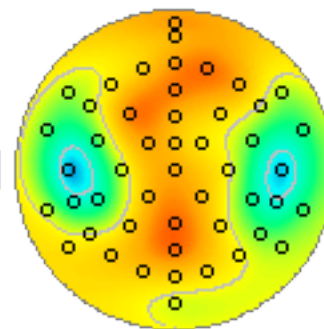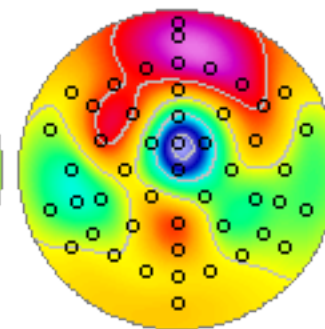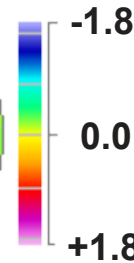

*NVS*  
(255)

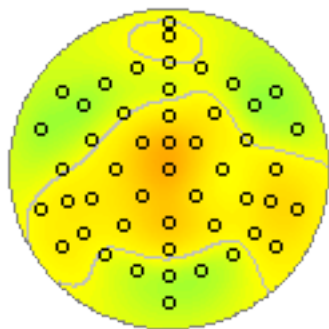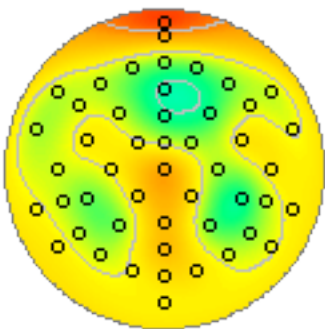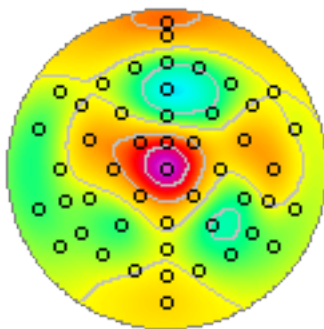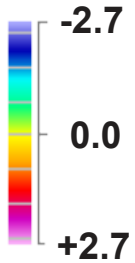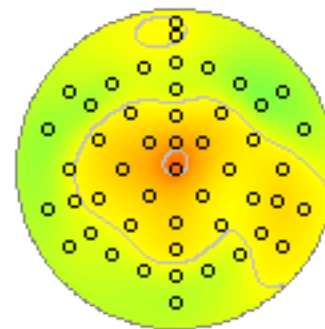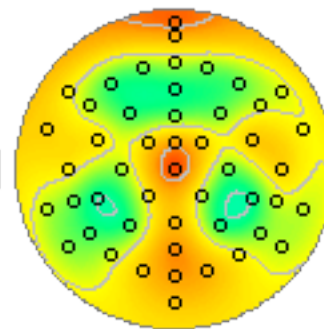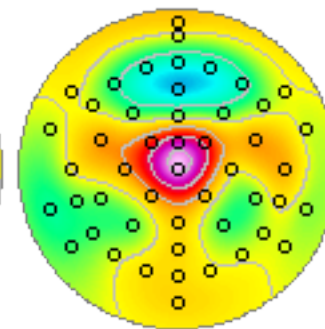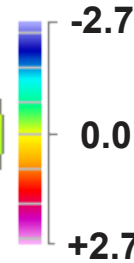

*P3b*  
(350)

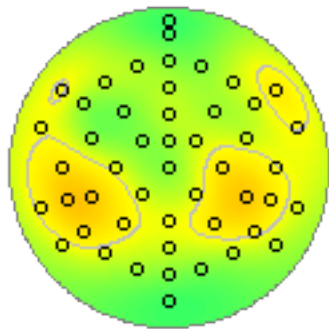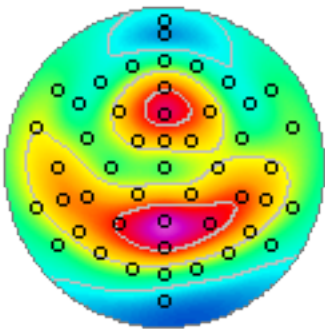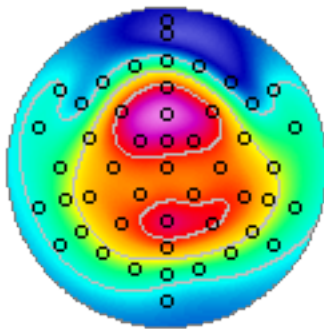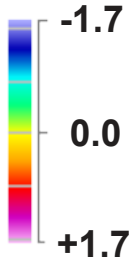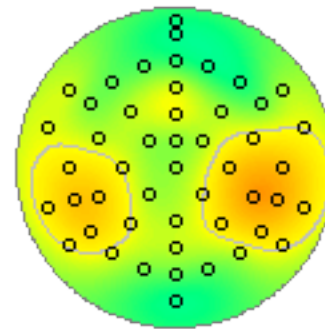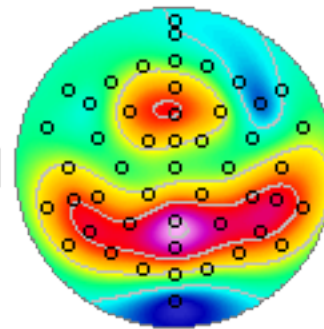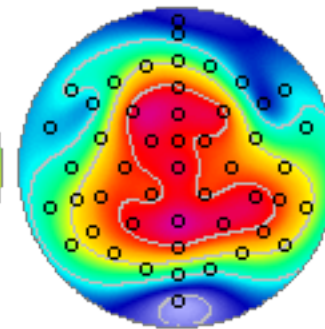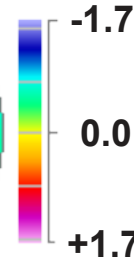

*FRN*  
(505)

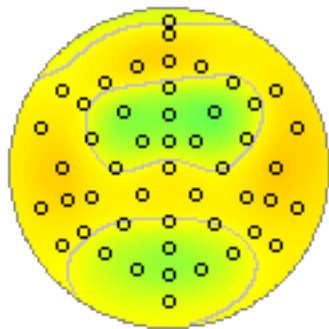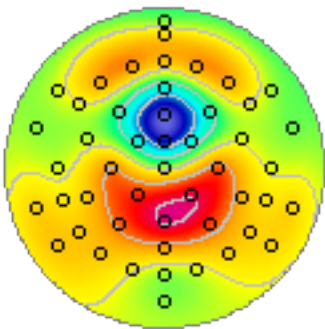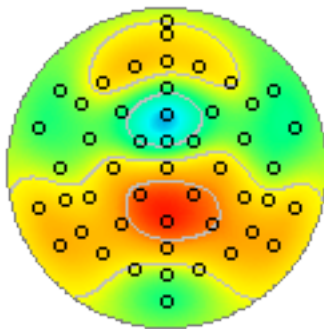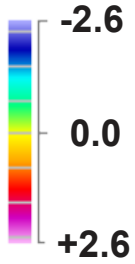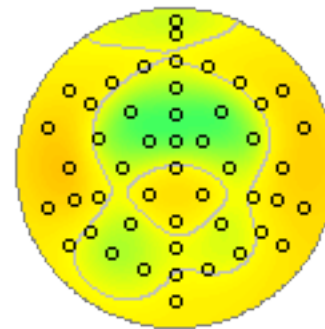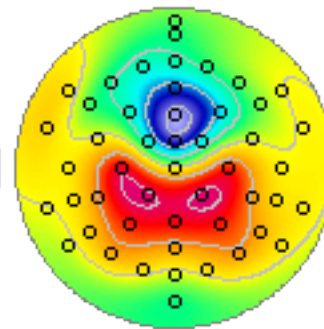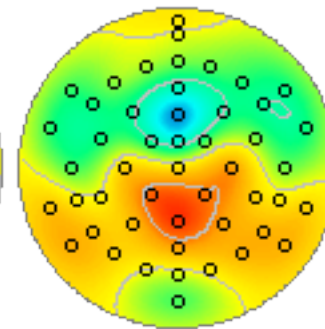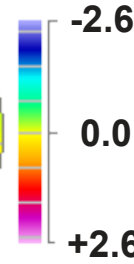

Supplement: NIHMS550359-supplement-01.pdf [file NIHMS550359-supplement-01.pdf]

# CSD-tfPCA

## Plots (Factor Loadings)

## Topographies (Factor Scores)

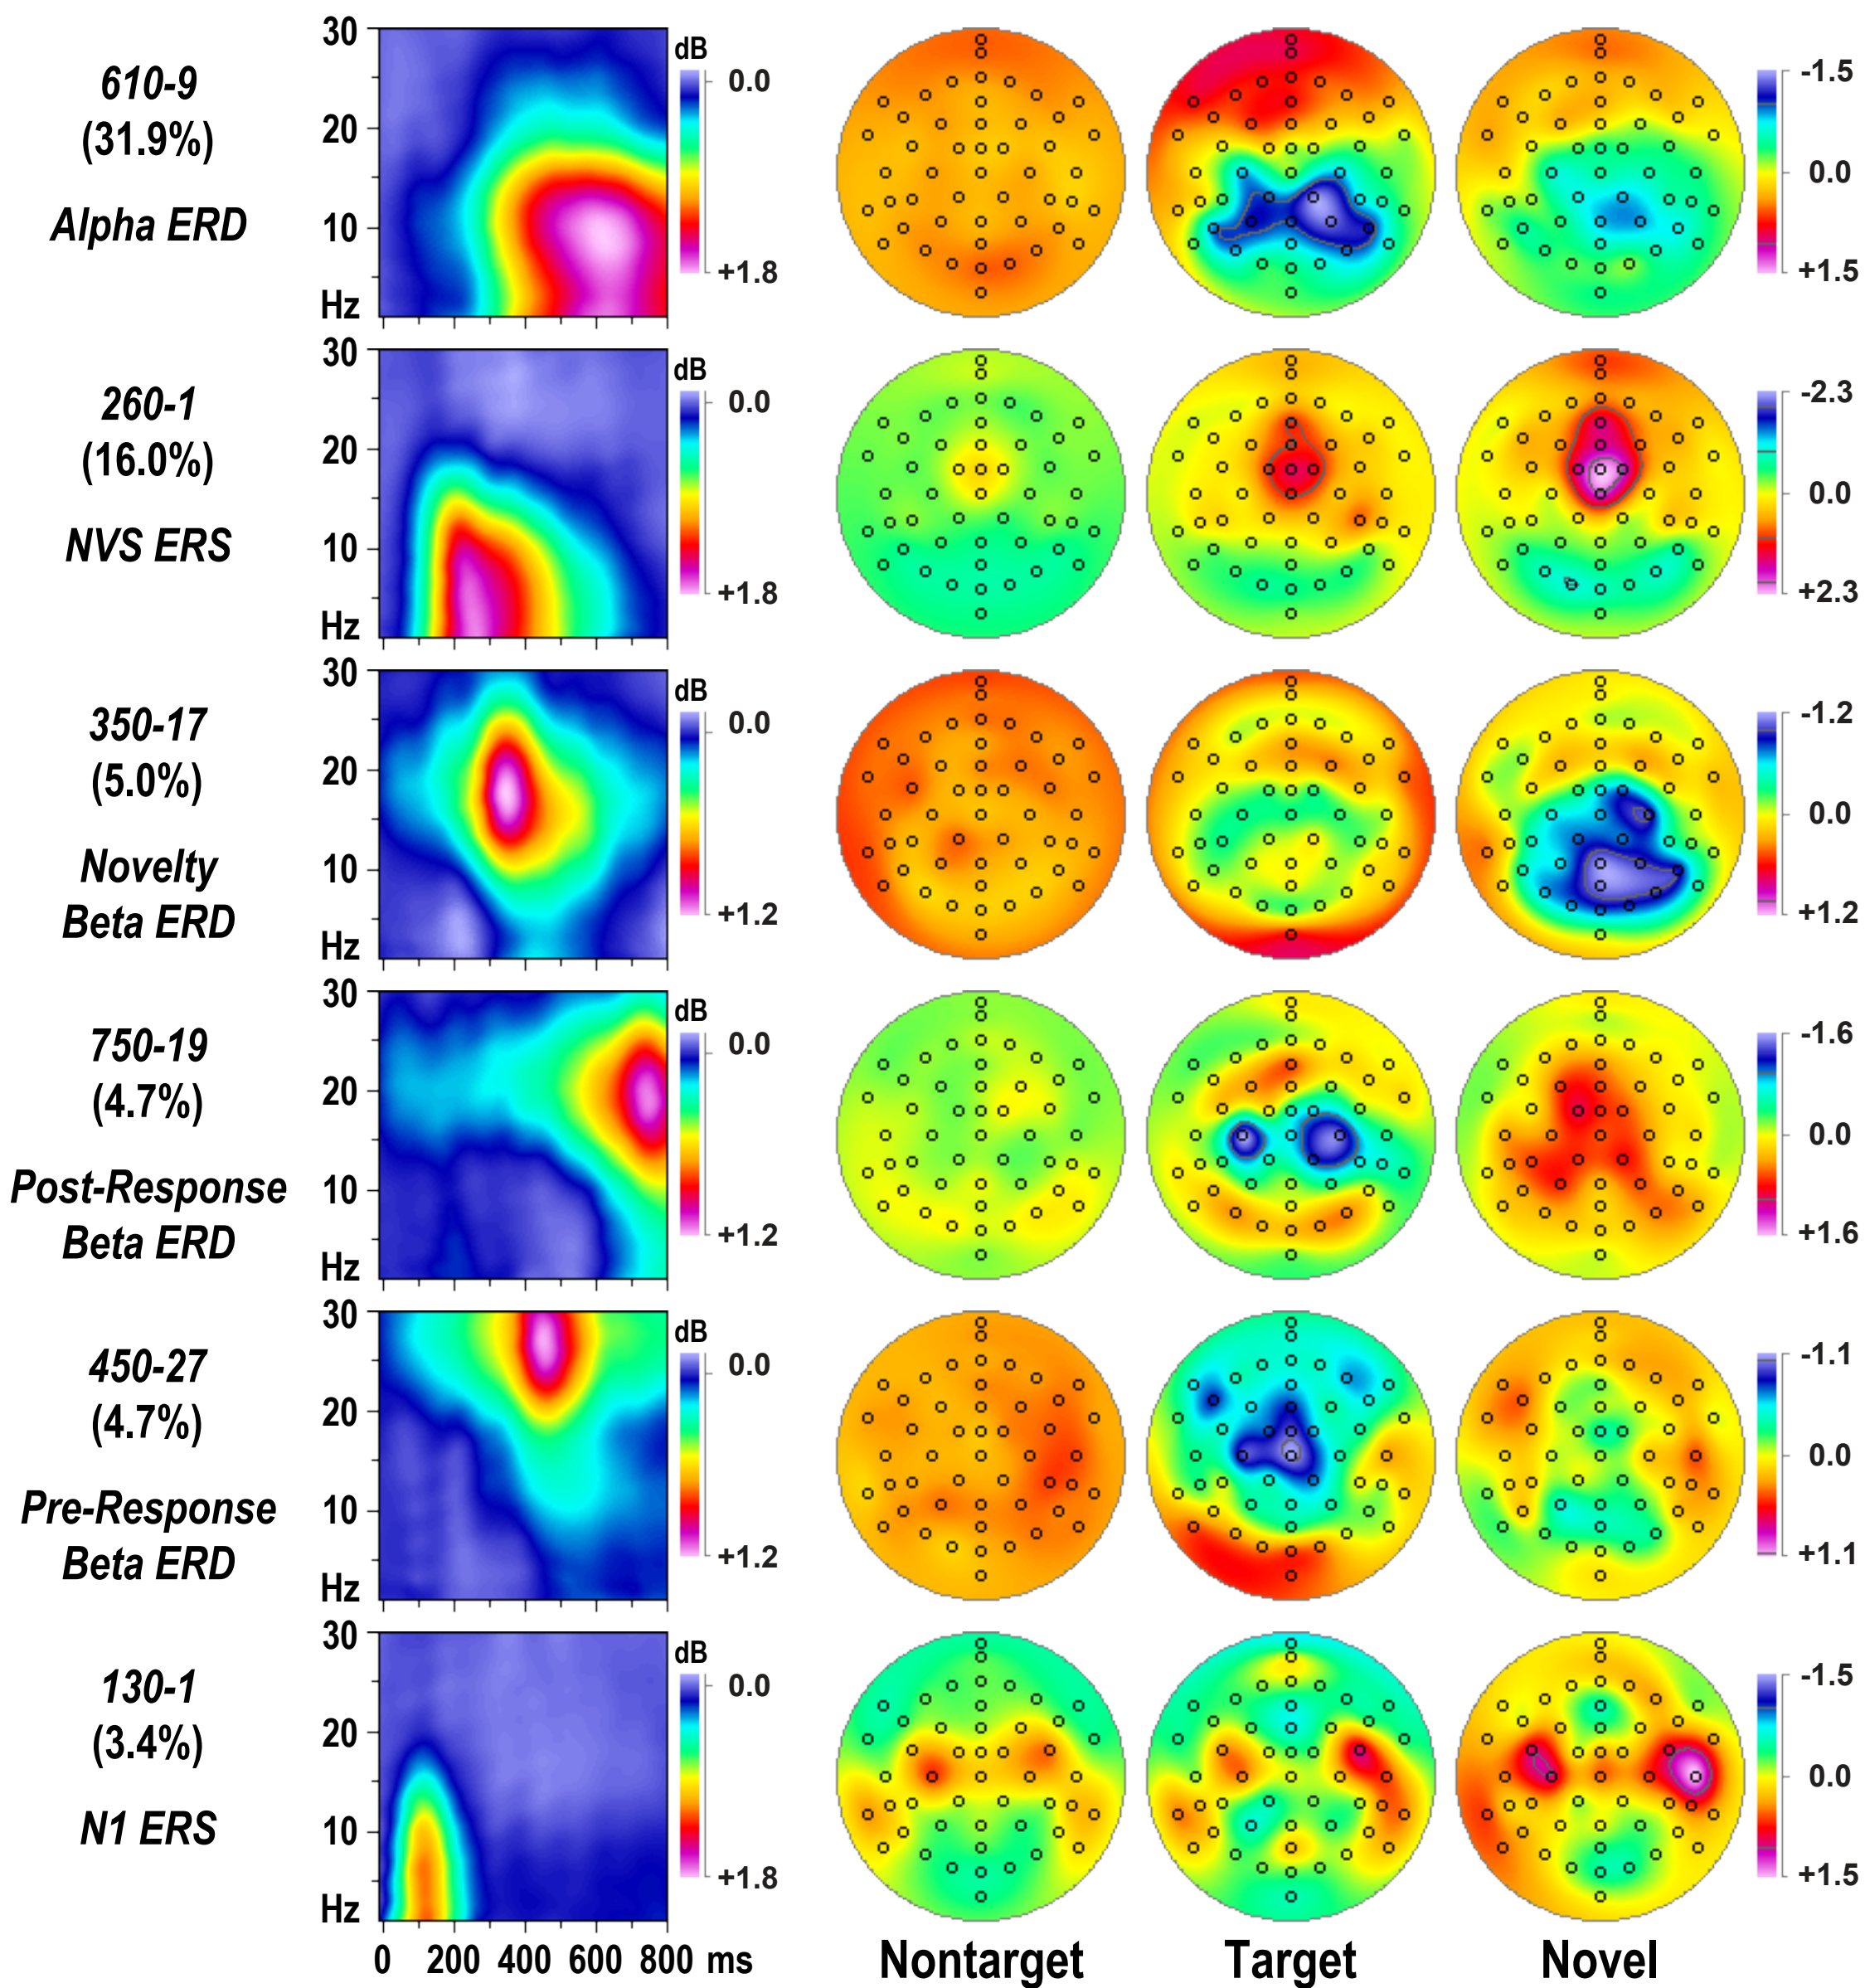

Supplement: NIHMS550359-supplement-02.pdf [file NIHMS550359-supplement-02.pdf]

# CSD-tfPCA

## Plots (Factor Loadings)

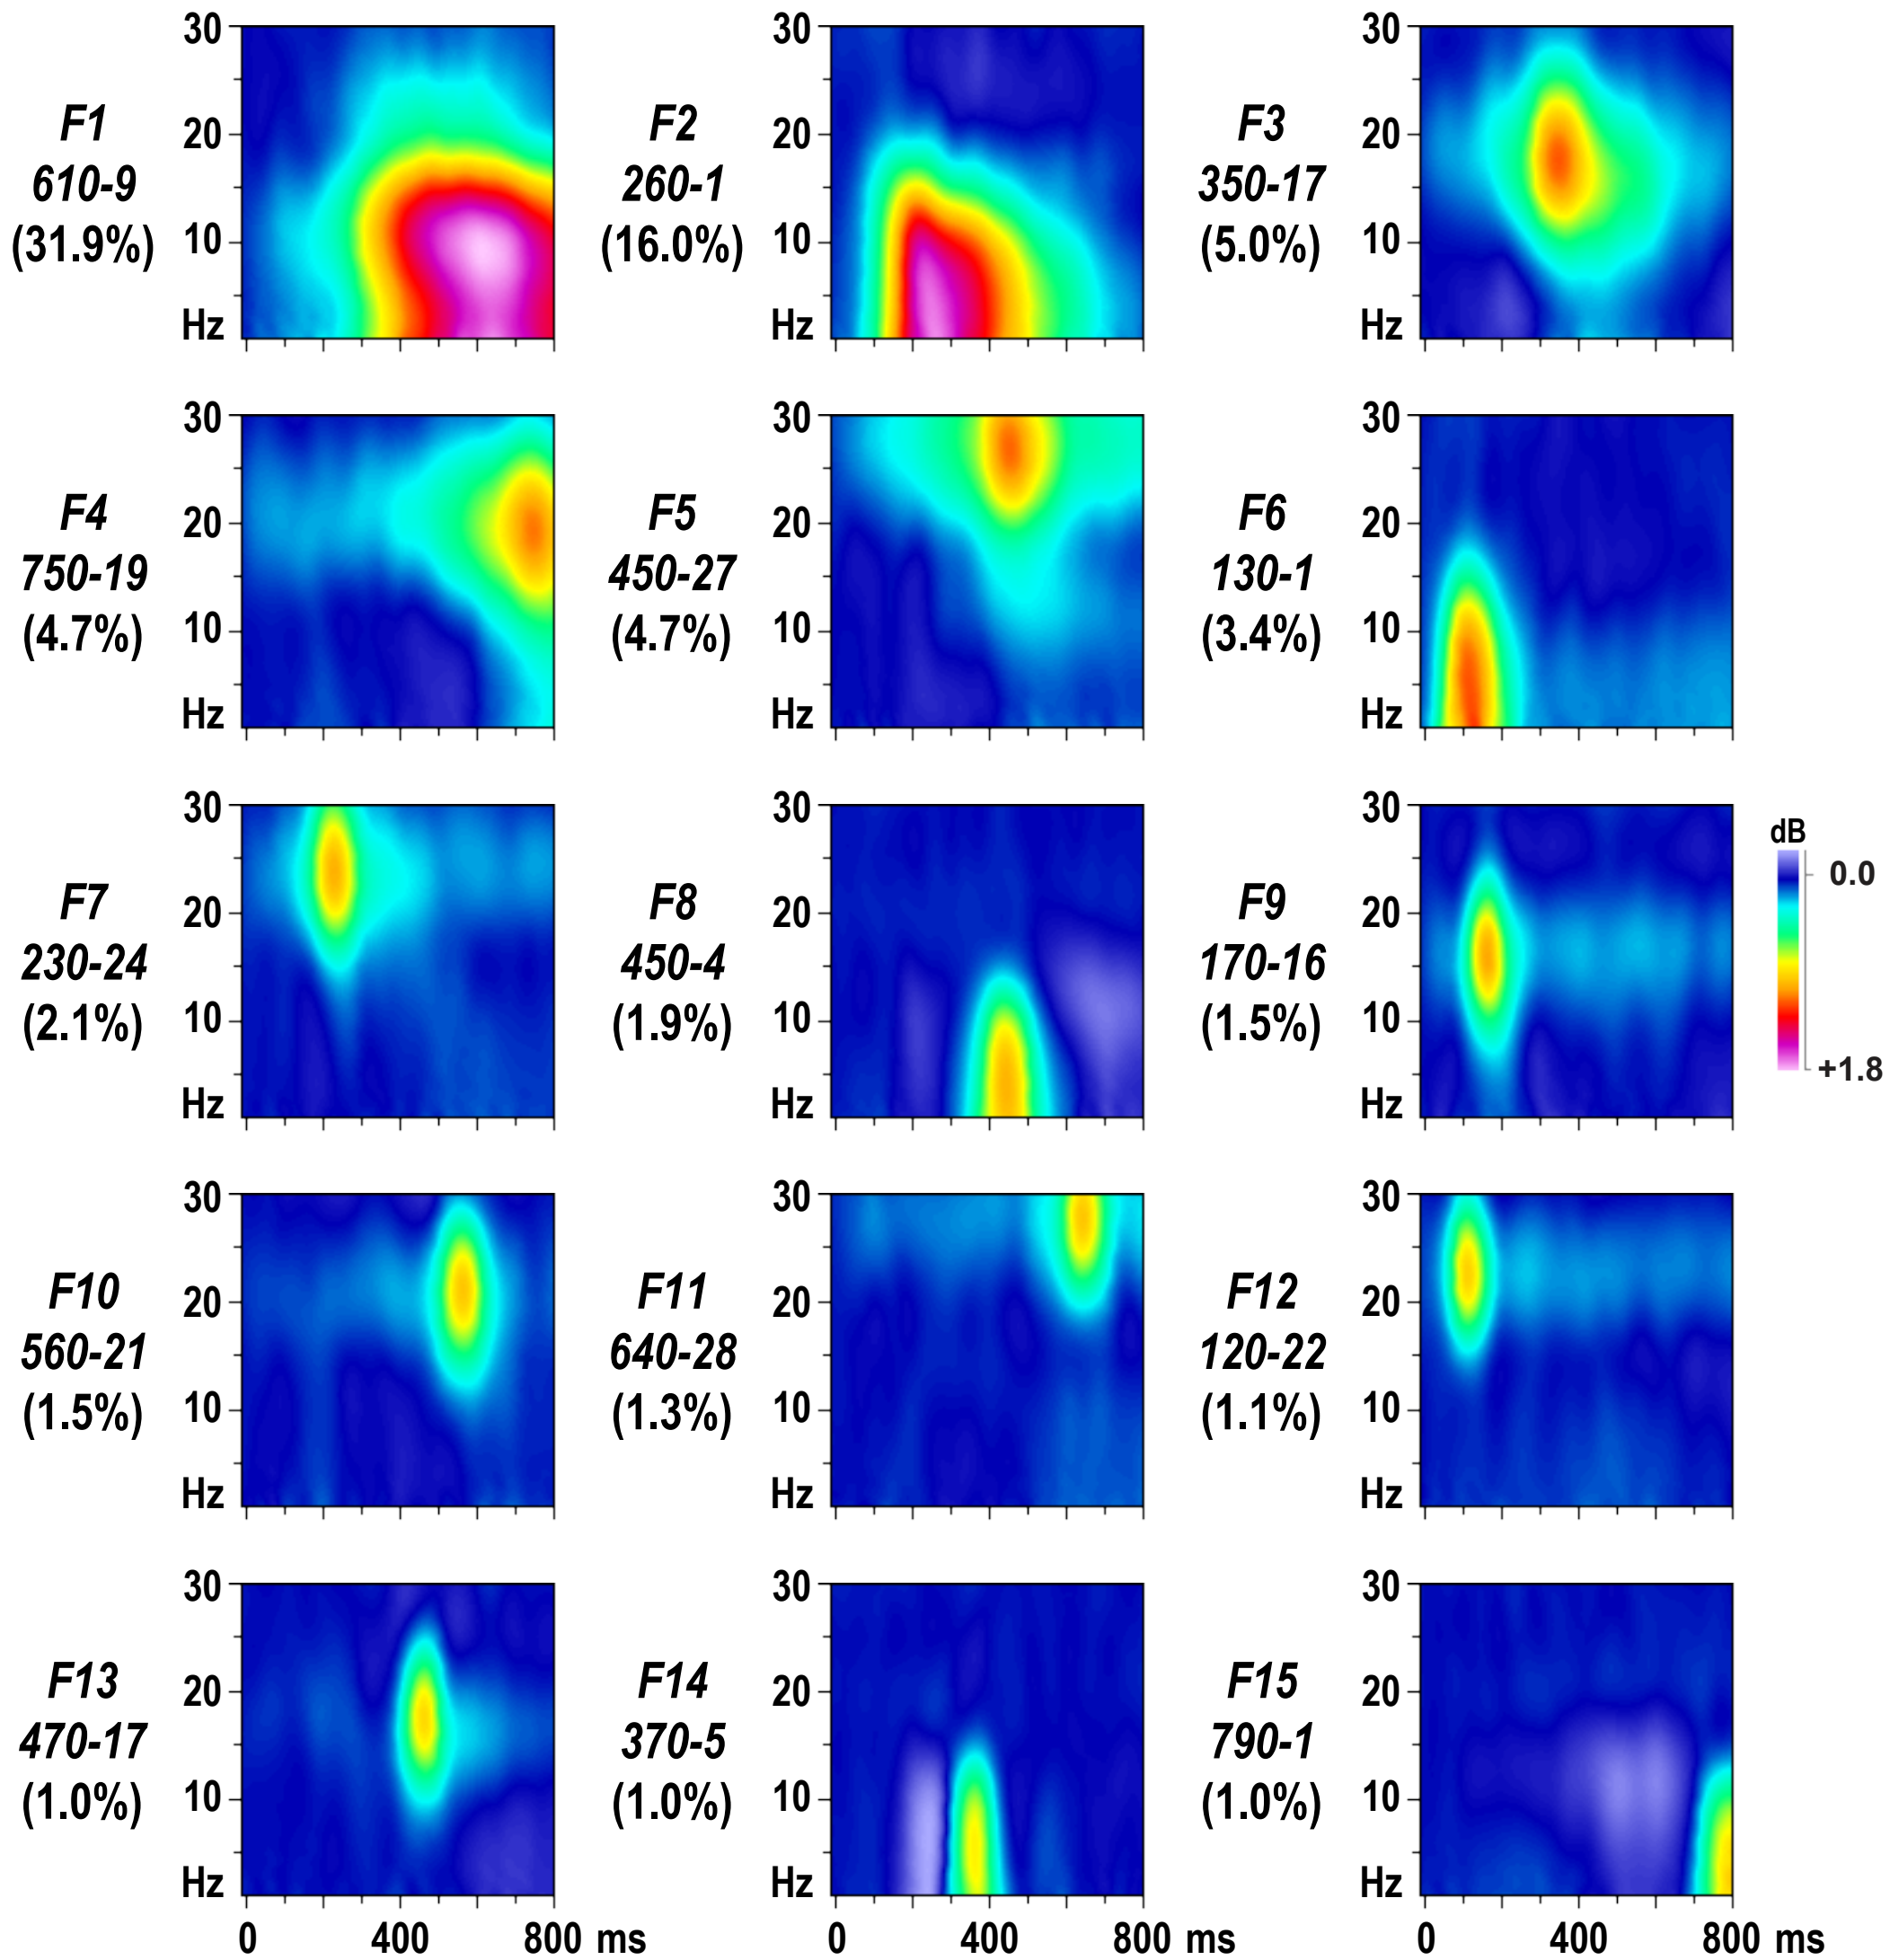

Supplement: NIHMS550359-supplement-03.pdf [file NIHMS550359-supplement-03.pdf]
